# Supplementary material for: Effects of Mixes of Peat with Different Rates of Spruce, Pine Fibers, or Perlite on the Growth of Blueberry Saplings
Source: MDPI journal article supplement (doi:10.3390/horticulturae9020151), 2023-01-24
Supplement: s1 [file s1]

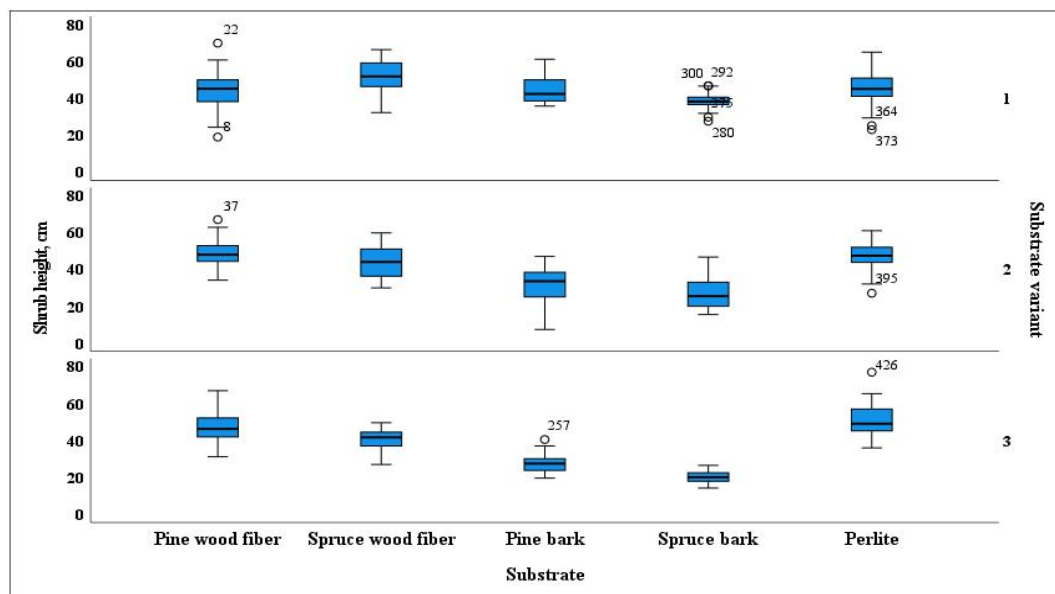

**Figure S1.** Effect of mixes of peat with different additions of wood and bark fibers and perlite on the height of blueberry saplings.

Circle ° shows conditional outliers. Conditional outliers are data points that belong to one of the intervals  $[Q1 - 3 \times IQR; Q1 - 1.5 \times IQR]$  or  $[Q3 + 1.5 \times IQR; Q3 + 3 \times IQR]$ . Q1 —lower quartile; Q3—upper quartile; IQR = Q3–Q1, interquartile range.

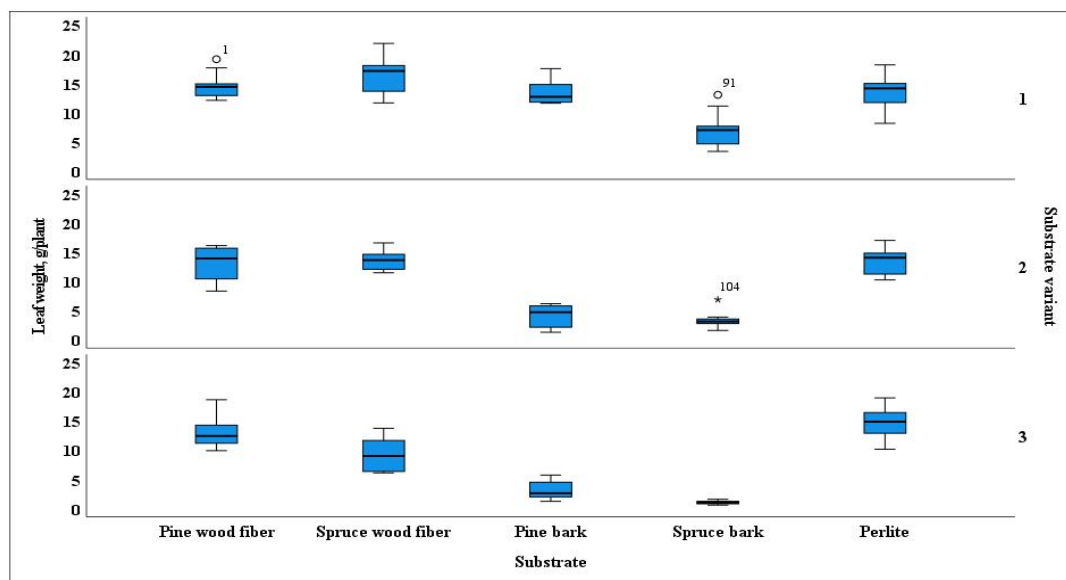

**Figure S2.** Effect of mixes of peat with different additions of wood and bark fibers and perlite on the height of blueberry saplings.

Asterisk \* shows outliers; circle ° shows conditional outliers. Conditional outliers are data points that belong to one of the intervals  $[Q1 - 3 \times IQR; Q1 - 1.5 \times IQR]$  or  $[Q3 + 1.5 \times IQR; Q3 + 3 \times IQR]$ . Outliers are data points whose values are smaller than  $Q1 - 3 \times IQR$  or bigger than  $Q3 + 3 \times IQR$ . Q1 —lower quartile; Q3—upper quartile; IQR = Q3–Q1, interquartile range.

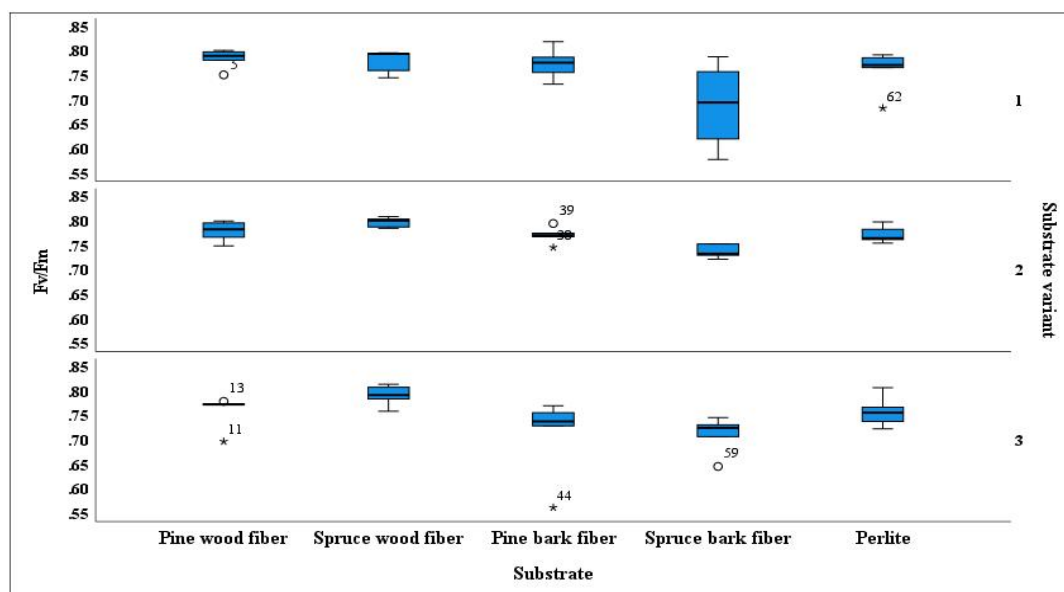

**Figure S3.** Effect of mixes of peat with different additions of wood and bark fibers and perlite on the chlorophyll fluorescence (Fv / Fm) of the blueberry saplings leaves. Asterisk \* shows outliers; circle ° shows conditional outliers. Conditional outliers are data points that belong to one of the intervals  $[Q1 - 3 \times IQR; Q1 - 1.5 \times IQR]$  or  $[Q3 + 1.5 \times IQR; Q3 + 3 \times IQR]$ . Outliers are data points that values are smaller than  $Q1 - 3 \times IQR$  or bigger than  $Q3 + 3 \times IQR$ . Q1—lower quartile; Q3—upper quartile; IQR =  $Q3 - Q1$ , interquartile range.

**Table. S1.** Effect of mixes of peat with the same percentage of components on the height (cm) of blueberry saplings.

| Substrates                  | Substrate variant      |                       |                       |
|-----------------------------|------------------------|-----------------------|-----------------------|
|                             | 1<br>15% v/v           | 2<br>30%, v/v         | 3<br>45%, v/v         |
| Peat + fiber of pine wood   | 44.26 ± 10.45 <i>b</i> | 48.09 ± 7.69 <i>a</i> | 47.41 ± 8.50 <i>a</i> |
| Peat + fiber of spruce wood | 52.59 ± 8.28 <i>a</i>  | 44.02 ± 8.29 <i>a</i> | 40.57 ± 5.52 <i>b</i> |
| Peat + fiber of pine bark   | 44.31 ± 6.95 <i>b</i>  | 31.48 ± 9.41 <i>b</i> | 27.74 ± 5.32 <i>c</i> |
| Peat + fiber of spruce bark | 38.51 ± 4.59 <i>c</i>  | 26.97 ± 7.98 <i>c</i> | 19.90 ± 3.28 <i>d</i> |
| Peat + perlite              | 44.95 ± 9.54 <i>b</i>  | 46.51 ± 7.62 <i>a</i> | 50.41 ± 8.41 <i>a</i> |

Values followed by different lowercase letters, within the column, indicate statistically significant differences by Duncan's test,  $p = 0.05$ .

**Table S2.** Effect of mixes of peat with the same percentage of components on the leaf weight (g/plant) of the blueberry saplings.

| Substrates                  | Substrate variant      |                       |                       |
|-----------------------------|------------------------|-----------------------|-----------------------|
|                             | 1<br>15% v/v           | 2<br>30% v/v          | 3<br>45% v/v          |
| Peat + fiber of pine wood   | 14.55 ± 2.29 <i>ab</i> | 13.26 ± 2.67 <i>a</i> | 13.08 ± 2.55 <i>a</i> |
| Peat + fiber of spruce wood | 16.41 ± 3.14 <i>a</i>  | 13.70 ± 1.71 <i>a</i> | 9.31 ± 2.89 <i>b</i>  |
| Peat + fiber of pine bark   | 13.43 ± 2.00 <i>b</i>  | 4.17 ± 1.93 <i>b</i>  | 3.03 ± 1.45 <i>c</i>  |
| Peat + fiber of spruce bark | 7.05 ± 3.11 <i>c</i>   | 3.33 ± 1.44 <i>b</i>  | 1.07 ± 0.35 <i>d</i>  |
| Peat + perlite              | 13.78 ± 3.09 <i>b</i>  | 13.50 ± 2.25 <i>a</i> | 14.63 ± 2.52 <i>a</i> |

Values followed by different lowercase letters, within the column, indicate statistically significant differences by Duncan's test,  $p = 0.05$ .

**Table S3.** Effect of mixes of peat with the same percentage of components on the chlorophyll fluorescence (Fv / Fm) of the blueberry saplings leaves.

| Substrates                  | Substrate variant      |                         |                         |
|-----------------------------|------------------------|-------------------------|-------------------------|
|                             | 1<br>15% v/v           | 2<br>30% v/v            | 3<br>45% v/v            |
| Peat + fiber of pine wood   | 0.784 ± 0.020 <i>a</i> | 0.779 ± 0.021 <i>ab</i> | 0.759 ± 0.035 <i>ab</i> |
| Peat + fiber of spruce wood | 0.778 ± 0.024 <i>a</i> | 0.797 ± 0.010 <i>a</i>  | 0.791 ± 0.022 <i>a</i>  |
| Peat + fiber of pine bark   | 0.774 ± 0.033 <i>a</i> | 0.771 ± 0.018 <i>b</i>  | 0.711 ± 0.085 <i>b</i>  |
| Peat + fiber of spruce bark | 0.689 ± 0.090 <i>b</i> | 0.738 ± 0.014 <i>c</i>  | 0.711 ± 0.039 <i>b</i>  |
| Peat + perlite              | 0.760 ± 0.044 <i>a</i> | 0.773 ± 0.018 <i>b</i>  | 0.758 ± 0.032 <i>ab</i> |

Values followed by different lowercase letters, within the column, indicate statistically significant differences by Duncan's test,  $p = 0.05$ .
